# Supplementary material
Source: Springer Nature journal article supplement (https://www.springermedizin.de/resource/supplementary/12885_2013_4699_MOESM5_ESM.pdf/9467030)
Supplement: MOESM5 [file 9467030]

**A**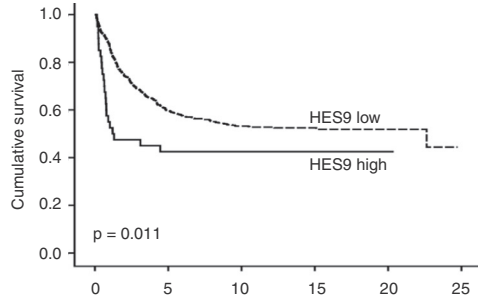

Patients at risk

|                       |     |     |     |     |    |
|-----------------------|-----|-----|-----|-----|----|
| HES9 low expression:  | 723 | 367 | 268 | 116 | 38 |
| HES9 high expression: | 44  | 17  | 11  | 3   | 1  |

**B**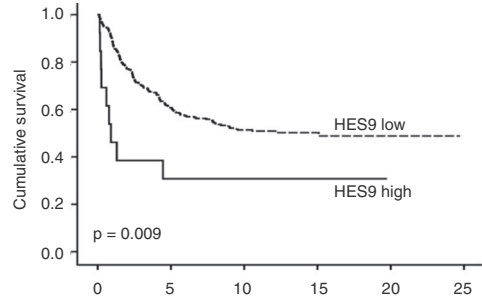

Patients at risk

|                       |     |     |     |    |    |
|-----------------------|-----|-----|-----|----|----|
| HES9 low expression:  | 351 | 178 | 126 | 49 | 16 |
| HES9 high expression: | 16  | 4   | 4   | 1  | 0  |

**C**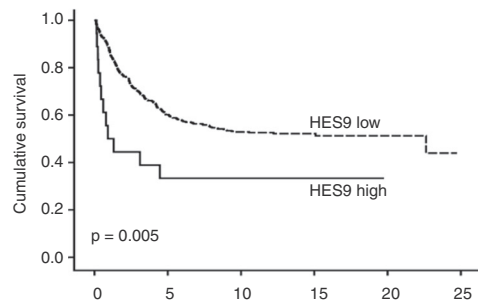

Patients at risk

|                       |     |     |     |    |    |
|-----------------------|-----|-----|-----|----|----|
| HES9 low expression:  | 534 | 270 | 197 | 83 | 28 |
| HES9 high expression: | 21  | 6   | 4   | 1  | 0  |
